# Supplementary material
Source: PubMed Central journal article supplement (PMC7473643)
Supplement: develop-147-191023-s1.pdf [file develop-147-191023-s1.pdf]

**Table S1. CRISPR targeting and allele identification**

|                             |                               |
|-----------------------------|-------------------------------|
| Prdm8 target sequence       | 5'-GGAATAAATCCTATGTATTT-3'    |
| Prdm8 E1 sgRNA (sense)      | 5'-TAGGGAATAAATCCTATGTATTT-3' |
| Prdm8 E1 sgRNA (anti-sense) | 5'-AAACAAATACATAGGATTTATTC-3' |

**Table S2. Primers**

| Primer name      | Sequence (5'-3')                                           |
|------------------|------------------------------------------------------------|
| fPCR Prdm8 E1 F  | TGTAAAACGACGGCCAGT GGACATACCAGCTGGAACCT                    |
| fPCR Prdm8 E1 R  | TGCTTGGTCTGCACAGTGTA                                       |
| BsrG1 co49 F     | TGCATTGAAATCCTTTGACAAACGGAATAAATCCTATGTAC                  |
| Nde1 co51 F      | TTATGACACCATAGCCTTCATTGCATTGAAATCCTTTGACAAACGGAATAAATCATAT |
| Prdm8 E1 dCAPS R | ACTAATGGAGAGCCTTTCATTGCCTCAGGATCTAC                        |
| Prdm8 probe F    | TGCGCCAAATGCAACCTCTC                                       |
| Prdm8 probe R    | CATCCTCCTTGTCATTGTGCTGA                                    |
| Prdm8 RT-PCR F1  | GTATTTCCGGGTAGATCCTGAGGCAA                                 |
| Prdm8 RT-PCR R1  | ATGTGTAGCCATCTGTCAGGGCTTT                                  |
| RPL13 RT-PCR F   | AGATCCGCAGACGTAAGGCC                                       |
| RPL13 RT-PCR R   | CTCCTCCTCAGTACTGTCTCCC                                     |
